# Supplementary material for: Metal-Tolerant Bioinoculant Pseudomonas putida KNP9 Mediated Enhancement of Soybean Growth under Heavy Metal Stress Suitable for Biofuel Production at the Metal-Contaminated Site
Source: MDPI journal article supplement (doi:10.3390/en16114508), 2023-06-03
Supplement: s1 [file s1]

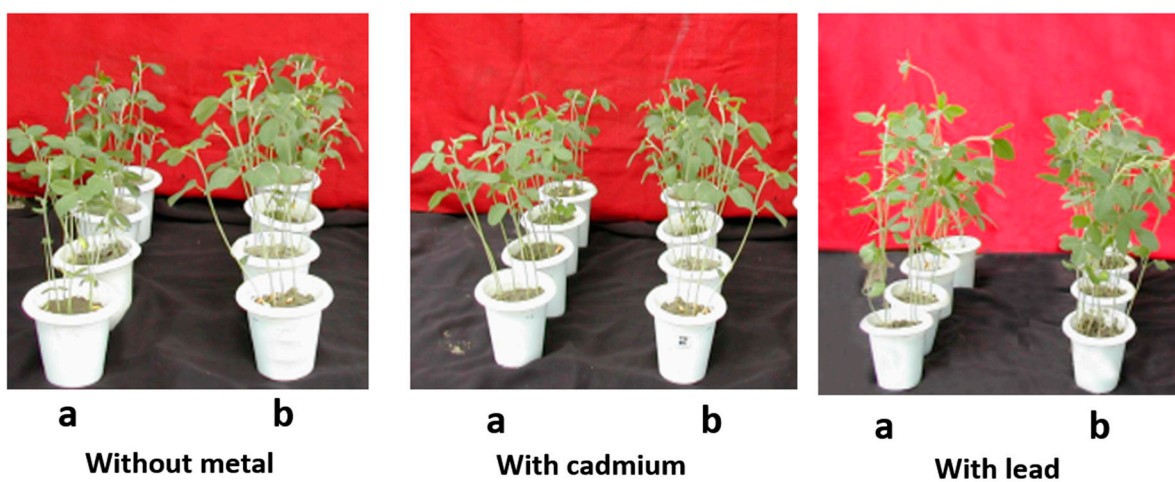

**Figure S1:** Pictures of pot trial experiment. Where (a) represents negative control without bioinoculant and (b) represents KNP9 treatment.

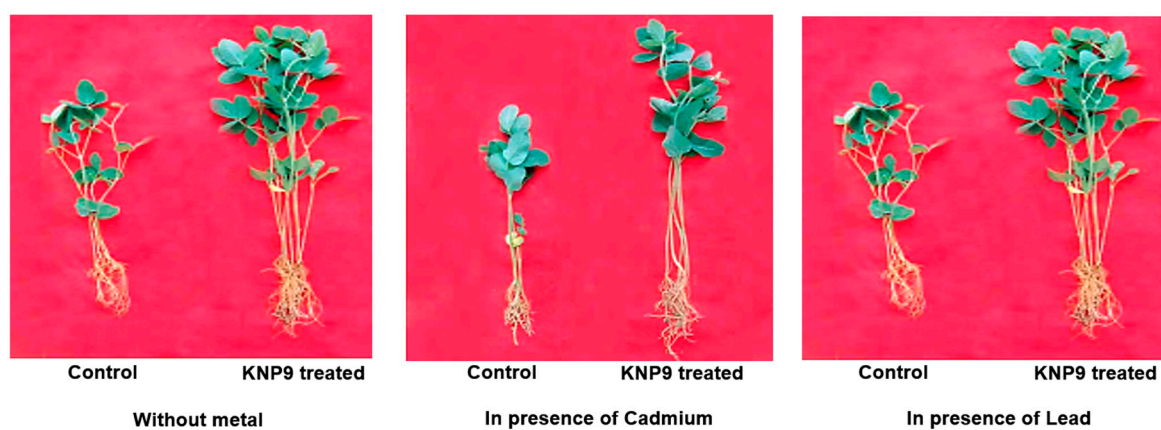

**Figure S2:** Comparative soybean plant growth images of the pot trial experiment.
